# Supplementary material for: Cadherin Related Family Member 2 Acts As A Tumor Suppressor By Inactivating AKT In Human Hepatocellular Carcinoma
Source: PubMed Central journal article supplement — J Cancer. 2019 Jan 29;10(4):864–73. doi: 10.7150/jca.27663 (PMC6400803; doi:10.7150/jca.27663), 2019-01-29
Supplement: jcav10p0864s1.pdf [file jcav10p0864s1.pdf]

**Supplementary Table 1**  
**Clinical Characteristics of 24 Patients With HCC According to CDHR2 Protein**  
**Expression Levels by Semi-quantitative PCR**

| Feature   | CDHR2       |             | P     |
|-----------|-------------|-------------|-------|
|           | Negative, n | Positive, n |       |
| Age       |             |             | 0.961 |
| <60 y     | 15          | 4           |       |
| ≥60 y     | 4           | 1           |       |
| Gender    |             |             | 0.014 |
| Male      | 17          | 2           |       |
| Female    | 2           | 3           |       |
| HBV       |             |             | 0.619 |
| Negative  | 1           | 0           |       |
| Positive  | 18          | 5           |       |
| AFP level |             |             | 0.902 |
| <400ng/mL | 12          | 3           |       |
| ≥400ng/mL | 6           | 2           |       |
| Size      |             |             | 0.780 |
| <5cm      | 10          | 3           |       |
| ≥5cm      | 9           | 2           |       |
| TNM       |             |             | 0.786 |
| 1         | 11          | 3           |       |
| 2         | 2           | 1           |       |
| 3         | 5           | 1           |       |
| 4         | 1           | 0           |       |

**Supplementary Table 2**  
**Clinical Characteristics of 111 Patients With HCC According to CDHR2 Protein**  
**Expression Levels by IHC**

| Feature   | CDHR2       |             | P     |
|-----------|-------------|-------------|-------|
|           | Negative, n | Positive, n |       |
| Age       |             |             | 0.427 |
| <60 y     | 61          | 17          |       |
| ≥60 y     | 28          | 5           |       |
| Gender    |             |             | 0.477 |
| Male      | 71          | 16          |       |
| Female    | 18          | 6           |       |
| HBV       |             |             | 0.387 |
| Negative  | 3           | 0           |       |
| Positive  | 86          | 22          |       |
| AFP level |             |             | 0.466 |
| <400ng/mL | 60          | 13          |       |
| ≥400ng/mL | 29          | 9           |       |
| Size      |             |             | 0.221 |
| <5cm      | 37          | 6           |       |
| ≥5cm      | 52          | 16          |       |
| TNM       |             |             | 0.476 |
| 1         | 71          | 18          |       |
| 2         | 6           | 2           |       |
| 3         | 12          | 1           |       |
| 4         | 0           | 0           |       |

## Supplementary Figures

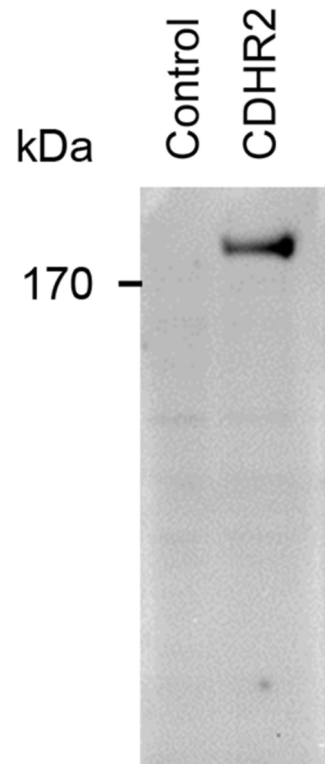

### Supplementary Figure 1 Validation of specificity of antibody against CDHR2.

SMMC-7721-CDHR2 cell extracts were collected and western blot was performed with a polyclonal antibody purified from rabbit immunized with a synthetic peptide derived from C-terminal of CDHR2 protein. SMMC-7721 cell extracts used as control.

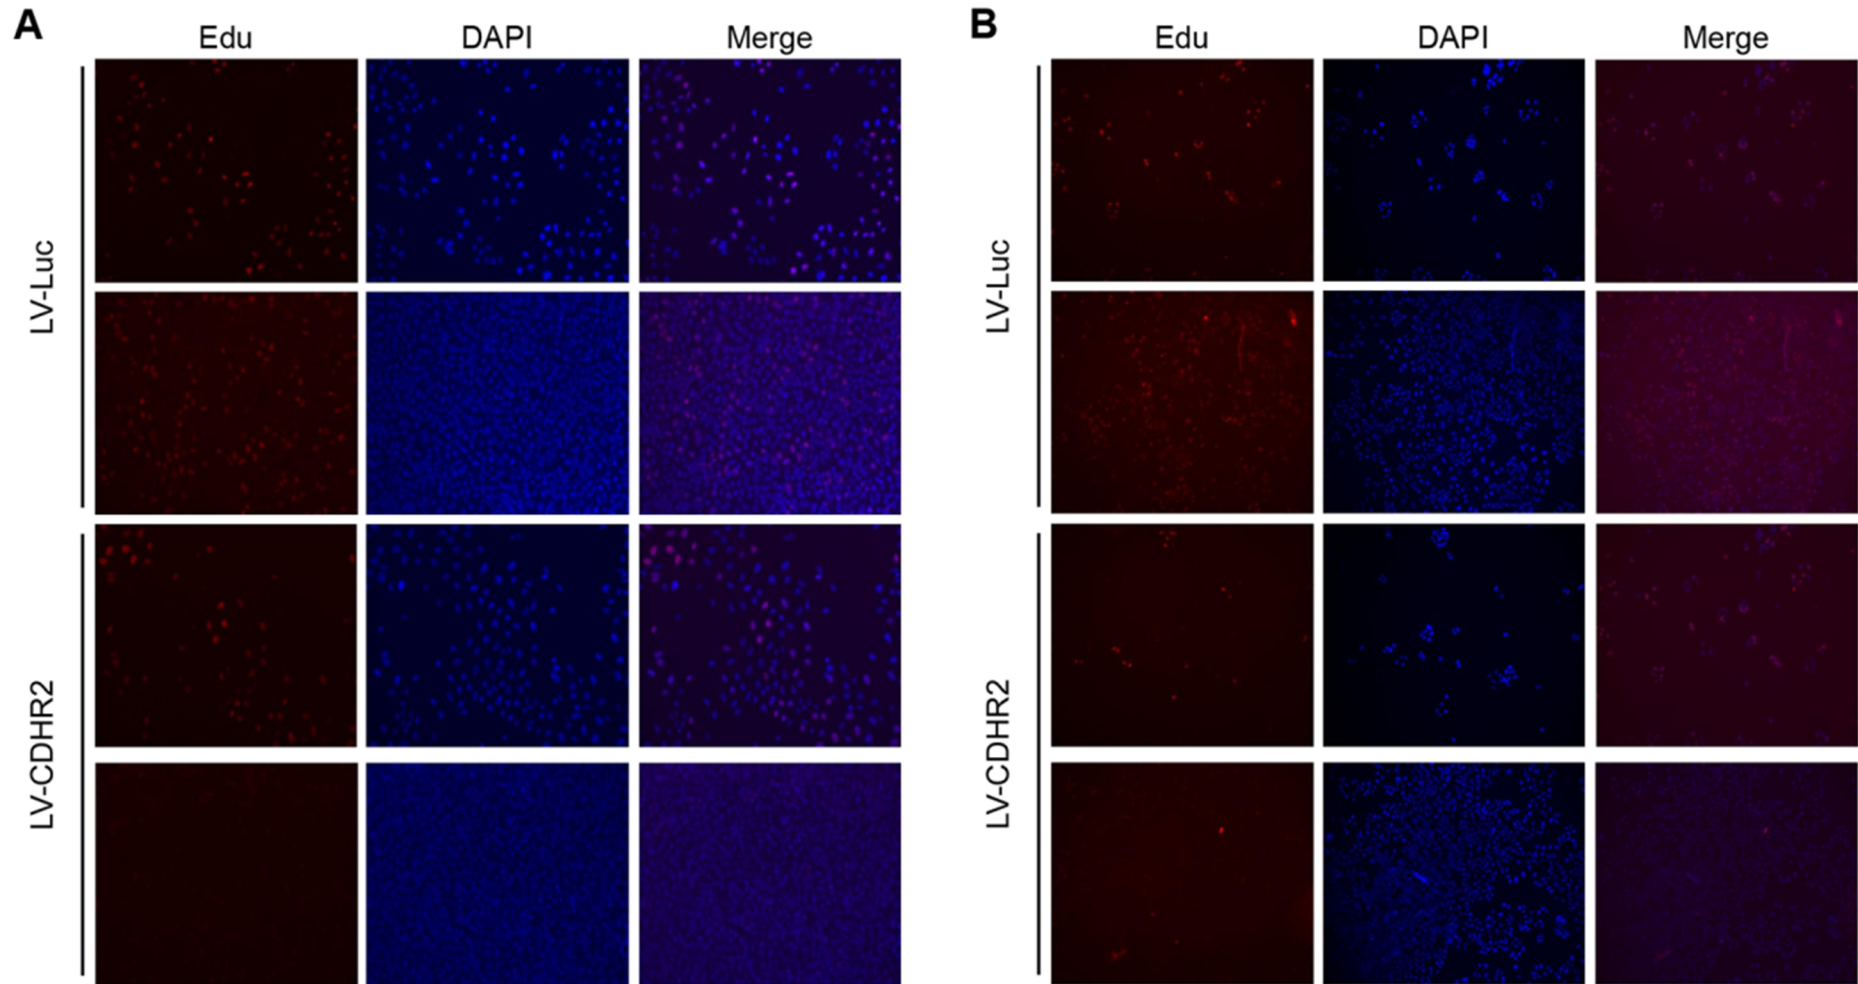

**Supplementary Figure 2 Edu incorporation assay to evaluate the proliferation rate.**

Edu incorporation assay to evaluate the proliferation rate of SMMC-7721 (A) and PLC/PRF/5 (B) cells infected with LV-CDHR2 compared with LV-Luc. Upper, sparse cultures; lower, confluent cultures.
